# Supplementary material
Source: PubMed Central journal article supplement (PMC4028125)
Supplement: NIHMS552644-supplement-1_si_001.pdf [file NIHMS552644-supplement-1_si_001.pdf]

# Supporting Information

for

## Adsorbate-Induced Anchoring Transitions of Liquid Crystals on Surfaces Presenting Metal Salts with Mixed Anions

*Jacob T. Hunter and Nicholas L. Abbott\**

Department of Chemical and Biological Engineering, University of Wisconsin-Madison, 1415  
Engineering Drive, Madison, Wisconsin 53706

\* To whom all correspondence should be addressed. Tel: 608-265-5278. Fax: 608-262-5434.

Email: [abbott@engr.wisc.edu](mailto:abbott@engr.wisc.edu).

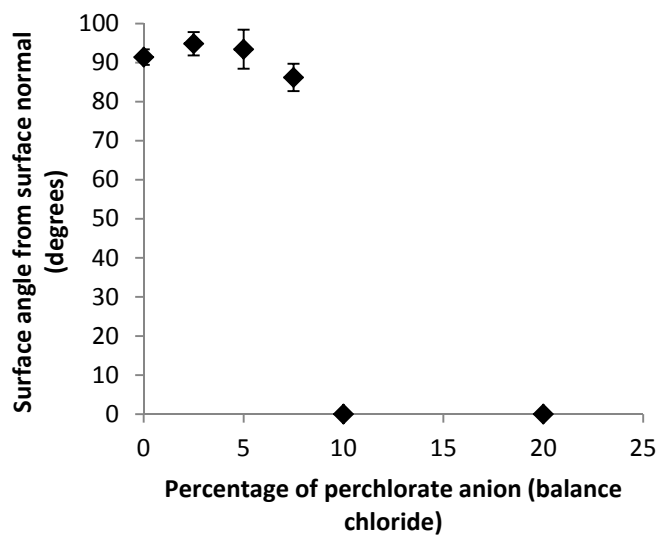

**Figure S1:** The measured tilt angle of 5CB at solid surfaces decorated with mixtures of copper (II) perchlorate and copper (II) chloride.

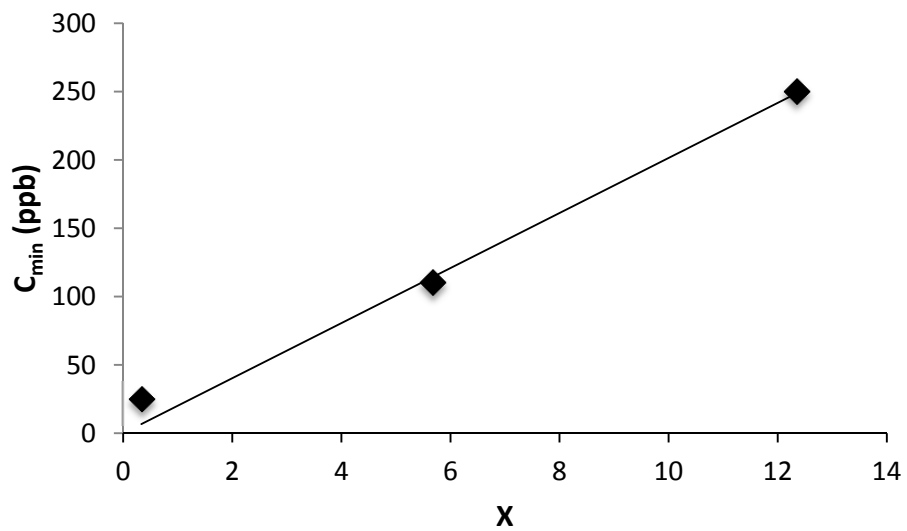

**Figure S2:** The sensitivity of the LC supported on aluminum (III) to DMMP (data from Figure 6) as it relates to  $X$  ( $x_{perc} - x_{crit} / x_{crit}$ ). The data is from the aluminum (III) perchlorate/ nitrate system. The line represents a best fit of a linear line that goes through the origin.
